# Supplementary material for: A general prediction model for compound-protein interactions based on deep learning
Source: Front Pharmacol. 2024 Sep 4;15:1465890. doi: 10.3389/fphar.2024.1465890 (PMC11408283; doi:10.3389/fphar.2024.1465890)
Supplement: Supplementary file 2 [file Table3.XLSX]

## Sheet: Sheet1
pubchem_id	uniprot_id
72	P23219
72	P09917
72	P35354
72	P27338
72	P00326
72	P35030
72	P17252
72	P05771
72	P05129
72	O43451
72	Q05513
72	O43570
72	P23280
72	Q16790
72	P00915
72	Q9ULX7
72	P22748
72	P00918
72	P43166
247	P10415
311	P07741
311	P15121
311	P40926
311	P12931
311	P12724
311	P15086
311	Q9HB21
311	P07360
311	P07998
311	P62312
311	Q9BY32
311	O75390
311	Q9GZU7
311	Q96RQ9
311	O14964
311	P00742
311	P35354
311	P07339
311	P01857
311	P29475
311	P14867
311	P42262
311	P60174
311	Q13002
311	P19113
311	O60240
311	Q00G26
323	P11509
323	P35354
323	P22303
323	P27338
323	P21397
323	Q07812
323	P47989
323	P08684
323	P36269
323	P09917
323	P48506
323	P09211
323	P09210
323	Q04828
323	O14977
323	P23280
323	P00915
323	P43166
323	P00918
323	Q9Y2D0
323	P35218
323	Q16790
323	Q9ULX7
323	O43570
323	P22748
323	P07451
323	P25116
370	P23219
370	P35354
370	P27338
370	P06401
370	P11388
370	Q02880
370	P08238
370	P07900
370	P48736
370	P55211
370	P42574
370	P04637
370	P49327
370	P48023
370	P10620
370	Q9HB55
370	P35218
370	P43166
370	P23280
370	O43570
370	Q9Y2D0
370	Q9ULX7
370	Q11130
370	P27487
370	Q16790
370	P00915
370	P07451
370	P00918
370	P22748
370	P05121
985	P08100
985	P10632
985	Q14541
985	O43617
985	P09466
985	P02689
985	P50897
985	P00709
985	Q07869
985	P07339
985	P00325
985	P00326
985	P23219
985	P35354
985	P01857
985	Q15596
985	P10415
985	P22301
985	P01375
985	P02452
985	P60484
985	Q15486
985	O76082
985	P49585
985	P15090
985	P12104
985	Q01469
985	O60603
985	Q03181
985	P05413
2266	P51857
2266	P31213
2266	P14679
3893	P00325
3893	P00326
3893	P01857
3893	P04054
3893	P05231
3893	P06276
3893	P10145
3893	P23219
3893	P25942
3893	P31749
3893	P33681
3893	P35354
3893	P42081
3893	Q04206
3893	Q9NRD8
5281	Q9UNK4
5281	Q07869
5281	P23219
5281	P35354
5281	P19793
5281	Q15596
5281	P01857
5281	P08047
5281	Q6UWV6
5281	Q03181
5571	P19793
5571	P23219
5571	P35354
5571	Q15596
8468	P35354
8468	P27338
8468	P21397
8468	P08913
8468	P23219
8468	P29474
8468	P17643
8468	P07949
8468	P22607
8468	P11362
8468	Q12866
8468	P21802
8468	P35968
8468	Q9UM73
8468	P29376
8468	Q15303
8468	P00519
8468	Q16832
8468	P00533
8468	P06213
8468	P17948
8468	P28482
10467	P23219
10467	P35354
10467	P08709
10467	P08238
10467	P07900
10467	P48736
10467	P01857
10467	Q15596
10494	P04746
10494	P24385
10494	P42574
10494	Q14790
10494	P55211
10494	P05177
10494	P08684
10494	P15559
10494	Q13547
10494	P09429
10494	P09601
10494	P05362
10494	P08581
10494	Q16236
10494	P04054
10494	P06746
10494	Q07869
10494	P60484
10494	P43119
10494	P23219
10494	P35354
10494	P18031
10494	P17706
10494	P11387
10494	P11388
10494	P36537
10494	P43490
10494	O75310
10494	O60218
10494	Q8TDU6
10494	P03372
10494	P27487
10494	P10275
10494	P04150
10494	O14757
10494	P20248
10494	P16444
10494	Q92731
10494	P11309
10494	Q16539
10494	P24941
10494	P35228
10494	P49841
10494	P37231
11005	P61925
11005	P17612
11005	O75521
11005	P35243
11005	P0DP23
11005	P00519
11005	P41235
11005	Q15788
11005	P62942
11005	P63098
11005	Q08209
11005	O43617
11005	P01308
11005	P17900
11005	P62330
11005	Q9Y6Y9
11005	P84077
11005	P43080
11005	P15151
11005	O00206
11005	Q07869
11005	P23219
11005	P35354
11005	P06276
11005	P04054
11005	P01857
11005	Q15596
11005	P04180
11005	O60603
11197	Q9NRD8
11197	P14598
64945	P00749
64945	P07858
64945	Q04206
64945	P40763
64945	P15692
64945	P24385
64945	P10415
64945	Q07817
64945	P01100
64945	P38936
64945	Q07812
64945	P55211
64945	P08253
64945	P14780
64945	P11802
64945	P01375
64945	P05412
64945	P05231
64945	Q00534
64945	P42574
64945	P04637
64945	P45983
64945	P35354
64945	P25963
64945	Q14790
64945	P49327
64945	P03956
64945	P08254
64945	P09038
64945	P09238
64945	P05362
64945	P01584
64945	P16220
64945	P16581
64945	P43115
64945	P23219
64945	Q07820
64945	P05129
64945	P15336
64945	P04141
64945	P16284
64945	Q13387
64945	O15392
64945	P29350
64945	P17677
64945	Q9NRD8
64945	P29474
64945	P18031
64945	O15357
64945	Q99732
64945	P30279
64945	P48023
64945	Q6UWV6
64945	O60218
64945	P51449
64945	P17706
64945	P28845
64945	P24666
64945	Q93009
64945	P10586
64945	P08246
73067	P35228
73067	P23219
73067	P21728
73067	P20309
73067	P11229
73067	P03372
73067	Q14524
73067	P08912
73067	P35354
73067	P08173
73067	P19793
73067	P41143
73067	Q14432
73067	P28223
73067	P35348
73067	P35368
73067	Q01959
73067	P07550
73067	P31645
73067	P35372
73067	Q92731
73067	P27487
73067	P53779
73067	P24941
73067	P48736
73067	P36544
73067	P17612
73067	P07477
73067	P11309
73067	P20248
73067	P0DP23
73466	P00918
73466	P27487
107848	P00918
107848	P10415
107848	P09601
107848	P17677
107848	Q6P1J6
107848	P09488
107848	P28161
114829	P23219
114829	P03372
114829	P35354
114829	P19793
114829	P07550
114829	P08238
114829	P07900
114829	P48736
114829	P27338
114829	P31645
114829	P61925
114829	P11511
336327	P35228
336327	P23219
336327	P21728
336327	P20309
336327	P11229
336327	P03372
336327	Q14524
336327	P08912
336327	P35354
336327	P08173
336327	P19793
336327	P28223
336327	P35348
336327	P08172
336327	P35368
336327	Q01959
336327	P07550
336327	P31645
336327	P35372
336327	Q92731
336327	P27487
336327	P53779
336327	P08238
336327	P07900
336327	P24941
336327	P48736
336327	P36544
336327	P07477
336327	P11309
336327	P20248
336327	P0DP23
336327	P41143
336327	Q14432
336327	P25100
439246	P03372
439246	Q04828
439246	Q16678
439246	Q9P2N6
439246	P04278
439246	P11511
439246	Q92731
439246	P23219
439246	P35354
439246	P08238
439246	P07900
439246	P48736
439246	Q04206
439246	P31749
439246	P10415
439246	P27361
439246	P28482
439246	P42574
439246	P49327
439246	P01130
439246	Q92934
439246	P00441
439246	P04040
439246	P37231
439246	P55157
439246	P04114
439246	Q6P1J6
439246	P04035
439246	P09211
439246	P22309
439246	Q07869
439246	P36956
439246	P00390
439246	P33527
439246	Q15848
439246	O75908
439246	P17174
439246	P80404
439246	P23141
439246	P35610
439246	P43166
439246	P27487
439246	P16152
439246	P22748
439246	O43570
439246	P14061
442433	P00918
442813	P35228
442813	P03372
442813	P10275
442813	P35354
442813	P08709
442813	P35968
442813	P27487
442813	P0DP23
442813	P37231
443354	P00918
444972	P23368
444972	P16930
444972	P80404
444972	P23415
444972	P17174
444972	P14867
444972	P12931
444972	P07339
444972	P06276
444972	P00325
444972	P00326
444972	P07327
444972	P00505
444972	P21549
444972	P31040
444972	P60174
444972	P35030
444972	Q12809
444972	P00742
444972	P35354
444972	P08238
444972	P07900
444972	P0DP23
445639	O00519
445639	O00767
445639	O14746
445639	P00325
445639	P00326
445639	P00441
445639	P00747
445639	P00749
445639	P01308
445639	P02741
445639	P04035
445639	P04040
445639	P04626
445639	P05121
445639	P05164
445639	P05305
445639	P06307
445639	P06858
445639	P07148
445639	P07327
445639	P10082
445639	P11168
445639	P11597
445639	P15090
445639	P17677
445639	P19021
445639	P19793
445639	P23219
445639	P23560
445639	P27169
445639	P35030
445639	P35354
445639	P35610
445639	P37231
445639	P50120
445639	P52945
445639	P55851
445639	P55916
445639	Q01469
445639	Q03181
445639	Q07075
445639	Q07869
445639	Q15596
445639	Q16620
445639	Q99966
445639	Q99973
445639	Q9ULA0
445858	P23219
445858	P35354
445858	P29474
445858	P08913
445858	P23975
445858	P35348
445858	Q01959
445858	P07550
445858	P09960
445858	P27338
445858	P21397
445858	P17538
445858	P18089
445858	P00749
445858	P08238
445858	P07900
445858	O43570
445858	Q9ULX7
445858	Q16790
445858	P23280
445858	P00915
445858	P43166
445858	P35218
445858	P00918
637542	Q14914
637542	P23219
637542	P35354
637542	P27338
637542	P21397
637542	P17538
637542	Q9NZK7
637542	P29474
637542	P14679
637542	O15467
637542	O43570
637542	Q9ULX7
637542	Q9Y2D0
637542	P23280
637542	P22748
637542	P07451
637542	P00918
637542	P00915
637542	Q16790
637542	P43166
637542	P35218
637542	P15121
637542	P22303
637542	P35228
637542	P27487
637542	P16444
637542	P61626
637542	P07477
637542	P24941
638278	P23219
638278	P03372
638278	P37231
638278	P35354
638278	P00918
638278	P07550
638278	Q92731
638278	Q16539
638278	P49841
638278	P08238
638278	P07900
638278	P24941
638278	P27338
638278	P61925
638278	P35228
638278	P10275
638278	P48736
638278	P11309
638278	P20248
638278	Q15596
638278	P01100
638278	Q07812
638278	P16581
638278	P19320
638278	Q9UBS5
638278	P14679
638278	Q9Y624
638278	O60674
638278	P02795
638278	P11166
638278	P15121
638278	P11511
638278	P14061
638278	P37059
638278	Q96P20
689043	P14174
689043	P23219
689043	P08588
689043	P35354
689043	P08913
689043	P18825
689043	P07550
689043	P27338
689043	P17538
689043	Q01959
689043	P15121
689043	P00749
689043	P21397
689043	P35348
689043	P25100
689043	P01375
689043	P04798
689043	P05771
689043	Q06187
689043	P14136
689043	P01344
689043	P16109
689043	P63000
689043	P27487
689043	P09917
689043	P18031
689043	P14780
689043	P23280
689043	Q9ULX7
689043	P35218
689043	Q16790
689043	O43570
689043	P07451
689043	P00915
689043	P03956
689043	P08253
689043	Q9Y2D0
689043	P00918
689043	P43166
689043	P00533
1794427	P15121
1794427	Q13547
1794427	O15379
1794427	Q9UBN7
1794427	Q92769
1794427	Q9UQL6
1794427	Q8WUI4
1794427	Q9BY41
1794427	Q96DB2
1794427	P56524
1794427	Q9UKV0
1794427	Q969S8
1794427	O60218
5280343	P08631
5280343	P48736
5280343	Q6NUS8
5280343	P25705
5280343	P06576
5280343	P36542
5280343	P11309
5280343	Q6NVY1
5280343	O94768
5280343	P03372
5280343	Q92731
5280343	P16083
5280343	P35869
5280343	Q16678
5280343	P60709
5280343	P68400
5280343	P67870
5280343	O00303
5280343	P07900
5280343	P54652
5280343	Q9Y230
5280343	Q15393
5280343	P22314
5280343	P04278
5280343	P16152
5280343	P17676
5280343	O75469
5280343	P23219
5280343	P10275
5280343	P37231
5280343	P35354
5280343	P08238
5280343	Q15596
5280343	P27487
5280343	P15121
5280343	P07477
5280343	P11388
5280343	Q02880
5280343	Q12809
5280343	Q14524
5280343	P00742
5280343	P07550
5280343	P08254
5280343	P08709
5280343	P29474
5280343	P19793
5280343	P22303
5280343	P14867
5280343	P27338
5280343	Q04206
5280343	P00533
5280343	P31749
5280343	P15692
5280343	P24385
5280343	P10415
5280343	Q07817
5280343	P01100
5280343	P38936
5280343	P56537
5280343	Q07812
5280343	P55211
5280343	P00749
5280343	P08253
5280343	P14780
5280343	P28482
5280343	P22301
5280343	P01133
5280343	P06400
5280343	P01375
5280343	P05412
5280343	P05231
5280343	P42771
5280343	O95433
5280343	P42574
5280343	P04637
5280343	P19419
5280343	P25963
5280343	P16435
5280343	P11926
5280343	P47989
5280343	Q14790
5280343	P04049
5280343	P00441
5280343	P17252
5280343	P03956
5280343	Q16665
5280343	P42224
5280343	Q06455
5280343	P11021
5280343	P04626
5280343	Q13085
5280343	P09601
5280343	P08684
5280343	P05177
5280343	Q03135
5280343	P01106
5280343	P13726
5280343	P17302
5280343	P04798
5280343	P05362
5280343	P01584
5280343	P13500
5280343	P16581
5280343	P19320
5280343	P43115
5280343	P10145
5280343	P05771
5280343	O15392
5280343	Q9NRD8
5280343	P04792
5280343	P01137
5280343	P49888
5280343	O43451
5280343	P60568
5280343	P14635
5280343	P00750
5280343	P07204
5280343	P05121
5280343	P02452
5280343	P01579
5280343	P09917
5280343	P60484
5280343	P01583
5280343	P05164
5280343	P14598
5280343	Q9UNQ0
5280343	Q92819
5280343	P09211
5280343	Q16236
5280343	P15559
5280343	P09874
5280343	O43242
5280343	P14672
5280343	P02461
5280343	O14625
5280343	P19875
5280343	Q96JK2
5280343	Q14994
5280343	O96017
5280343	P06213
5280343	O14493
5280343	Q07869
5280343	Q03181
5280343	Q00613
5280343	P02741
5280343	P02778
5280343	O15111
5280343	P10451
5280343	Q13950
5280343	Q01094
5280343	Q14209
5280343	P15309
5280343	P07339
5280343	P17936
5280343	P01344
5280343	P29965
5280343	P10914
5280343	P21860
5280343	P27169
5280343	P49895
5280343	Q15113
5280343	P55786
5280343	P52789
5280343	Q99801
5280343	P20936
5280343	P09488
5280343	P28161
5280343	P22748
5280343	P00918
5280343	P33527
5280343	Q16790
5280343	P35218
5280343	P23280
5280343	Q9ULX7
5280343	P07451
5280343	P53355
5280343	P37059
5280343	Q9UM73
5280343	P10632
5280343	P35968
5280343	P12931
5280343	P21917
5280343	O43570
5280343	P43166
5280343	P00915
5280343	P10253
5280343	Q2M2H8
5280343	P14410
5280343	P56817
5280343	P30530
5280343	P21397
5280343	P53350
5280343	Q9HC98
5280343	P19784
5280343	P08069
5280343	P27986
5280343	P49841
5280343	P04054
5280343	Q13554
5280343	Q16512
5280343	P00734
5280343	Q14576
5280343	Q15717
5280343	P15056
5280343	P45452
5280343	P30518
5280343	P05067
5280343	P36888
5280343	P11511
5280343	P06493
5280343	Q04760
5280343	Q9NPH5
5280343	O60285
5280343	Q96GD4
5280343	P08581
5280343	P51955
5280343	P25024
5280343	P51679
5280343	P16050
5280343	P18054
5280343	P49840
5280343	P06737
5280343	Q05397
5280343	Q16539
5280343	P53779
5280378	P35228
5280378	P23219
5280378	P11229
5280378	P03372
5280378	P10275
5280378	P37231
5280378	P35354
5280378	P19793
5280378	Q14432
5280378	P35348
5280378	Q01959
5280378	P07550
5280378	P31645
5280378	Q92731
5280378	P27487
5280378	Q16539
5280378	P49841
5280378	P08238
5280378	P07900
5280378	P24941
5280378	P27338
5280378	O14757
5280378	P07477
5280378	P11309
5280378	P20248
5280378	P0DP23
5280378	P61925
5280378	P29474
5280378	P22303
5280378	P05412
5280378	P05112
5280378	Q96EB6
5280378	P06576
5280378	P03923
5280378	P26439
5280378	P14060
5280378	Q16678
5280448	P35228
5280448	P23219
5280448	P03372
5280448	P10275
5280448	P37231
5280448	P35354
5280448	P19793
5280448	Q14432
5280448	Q92731
5280448	P27487
5280448	Q16539
5280448	P49841
5280448	P08238
5280448	P07900
5280448	P24941
5280448	O14757
5280448	P07477
5280448	P11309
5280448	P20248
5280448	Q15596
5280448	P0DP23
5280448	P07550
5280450	P23219
5280450	P35354
5280450	P19793
5280450	Q15596
5280450	P23975
5280450	P01857
5280450	P47869
5280450	P14867
5280450	Q8NER1
5280450	P11229
5280450	P08172
5280450	Q16445
5280450	P15090
5280450	P05413
5280450	P37231
5280450	Q07869
5280450	Q03181
5280460	P23219
5280460	P16083
5280460	P35354
5280460	P00915
5280460	P07550
5280460	P09960
5280460	P27338
5280460	P42262
5280460	P23975
5280460	P43166
5280460	O43570
5280460	Q16790
5280804	P11388
5280804	Q02880
5280804	P00742
5280804	P00918
5280804	P43166
5280804	O43570
5280804	P22748
5280804	P47989
5280804	P09923
5280804	P15121
5280805	P08912
5280805	P18825
5280805	P08913
5280805	P22303
5280805	P42330
5280805	P16152
5280805	Q04206
5280805	P01375
5280805	P05231
5280805	P42574
5280805	P16435
5280805	P00441
5280805	P04040
5280805	P01584
5280805	P10145
5280805	P05771
5280805	P09917
5280805	P04035
5280805	Q92819
5280805	P09211
5280805	P49895
5280805	P21730
5280805	P01308
5280805	P06734
5280805	P05107
5280805	P21731
5280863	P35228
5280863	P23219
5280863	P10275
5280863	P37231
5280863	P35354
5280863	P08238
5280863	P48736
5280863	P17612
5280863	Q15596
5280863	P27487
5280863	P07477
5280863	P06401
5280863	P25116
5280863	P11229
5280863	P29474
5280863	P47869
5280863	P22303
5280863	P23975
5280863	P08172
5280863	P35368
5280863	P14867
5280863	P11388
5280863	P08709
5280863	P0DP23
5280863	Q04206
5280863	O14920
5280863	P31749
5280863	P10415
5280863	Q07812
5280863	P01375
5280863	P05412
5280863	O95433
5280863	P42574
5280863	P45983
5280863	P47989
5280863	P03956
5280863	P42224
5280863	P09601
5280863	P08684
5280863	P05177
5280863	P04798
5280863	P05362
5280863	P16581
5280863	P19320
5280863	O75469
5280863	Q16678
5280863	P09917
5280863	Q92819
5280863	P09211
5280863	P35869
5280863	O43242
5280863	P14672
5280863	Q14994
5280863	P06213
5280863	P49895
5280863	Q08209
5280863	P09488
5280863	P28161
5280863	P42330
5280863	P03973
5280934	O60427
5280934	P32418
5280934	Q8NER1
5280934	O95864
5280934	Q07869
5280934	Q96RI1
5280934	Q03181
5280934	P37231
5280934	P19793
5280934	Q9NXB9
5280934	Q9NYP7
5280934	P23219
5280934	P35354
5280934	Q15596
5280934	P48443
5280934	Q04206
5280934	P12004
5280934	P02768
5280934	P01106
5280934	P0DP23
5280934	P41235
5280934	P55851
5280934	P20823
5280934	P60709
5280934	Q12899
5280961	P11388
5280961	Q92731
5280961	Q14289
5280961	Q15788
5280961	P03372
5280961	Q15596
5280961	O95718
5280961	P11474
5280961	O75469
5280961	P31749
5280961	Q99527
5280961	Q16678
5280961	P04278
5280961	P23219
5280961	P37231
5280961	P35354
5280961	Q16539
5280961	P08238
5280961	P07900
5280961	P24941
5280961	O14757
5280961	P07477
5280961	P48736
5280961	Q04206
5280961	P00533
5280961	P40763
5280961	P15692
5280961	P10415
5280961	P01100
5280961	P38936
5280961	Q07812
5280961	P55211
5280961	P14780
5280961	P27361
5280961	P28482
5280961	P01375
5280961	P05412
5280961	P35228
5280961	P42771
5280961	O95433
5280961	P42574
5280961	P04637
5280961	P01130
5280961	Q00987
5280961	O14827
5280961	P04049
5280961	Q99973
5280961	P01033
5280961	Q16665
5280961	P08069
5280961	P42224
5280961	P04626
5280961	P10275
5280961	P05362
5280961	P01584
5280961	P13500
5280961	P16581
5280961	P19320
5280961	P02751
5280961	P10145
5280961	P04179
5280961	O15392
5280961	P29474
5280961	P01137
5280961	P49888
5280961	P14635
5280961	P30307
5280961	P60484
5280961	P04035
5280961	Q06187
5280961	Q9NYY3
5280961	P14136
5280961	P22309
5280961	O96017
5280961	Q07869
5280961	Q15113
5280961	P61812
5280961	Q13315
5280961	P15428
5280961	P01308
5280961	Q96KB5
5280961	O43683
5280961	Q12834
5280961	P15121
5280961	P02511
5280961	P07288
5280961	Q16543
5280961	Q9UBN7
5280961	Q13163
5280961	P53778
5280961	P02647
5280961	P53350
5280961	Q9NPC3
5280961	Q14676
5280961	Q15424
5280961	P13569
5280961	O75376
5280961	P35557
5280961	Q14654
5280961	Q07973
5280961	P43116
5280961	P43088
5280961	Q13421
5280961	P43405
5280961	Q06278
5280961	P24557
5280961	P00519
5280961	Q9NPD5
5280961	Q9Y6L6
5280961	P21397
5280961	P27338
5280961	Q9UNQ0
5280961	O43451
5280961	P14061
5280961	P29274
5280961	P27487
5280961	P11166
5280961	P28335
5280961	P28223
5281377	P35354
5281377	P08709
5281377	P0DP23
5281377	P04053
5281377	P04155
5281416	P10415
5281416	P38936
5281416	P06400
5281416	P11802
5281416	P42574
5281416	P03956
5281416	P08254
5281416	Q01094
5281426	P23219
5281426	P35354
5281426	P08913
5281426	P18825
5281426	P27338
5281426	P21397
5281426	P18089
5281426	P09960
5281426	P07339
5281426	Q16790
5281426	O43570
5281643	P11388
5281643	Q02880
5281643	P07477
5281643	P35228
5281643	P23219
5281643	P35354
5281643	P08238
5281643	P07900
5281643	P48736
5281643	Q15596
5281643	P15121
5281654	O14757
5281654	P03372
5281654	P07477
5281654	P08238
5281654	P08709
5281654	P0DP23
5281654	P10275
5281654	P11217
5281654	P11309
5281654	P14598
5281654	P14867
5281654	P15121
5281654	P17612
5281654	P18031
5281654	P20248
5281654	P22303
5281654	P23219
5281654	P24941
5281654	P25116
5281654	P27338
5281654	P27487
5281654	P29474
5281654	P35228
5281654	P35354
5281654	P37231
5281654	P42262
5281654	P47989
5281654	P48736
5281654	P49841
5281654	P78380
5281654	Q03181
5281654	Q04206
5281654	Q15596
5281654	Q15788
5281654	Q16539
5281654	Q92731
5281666	P35228
5281666	P23219
5281666	P03372
5281666	P10275
5281666	P37231
5281666	P35354
5281666	P27487
5281666	Q16539
5281666	P49841
5281666	P08238
5281666	P07900
5281666	P24941
5281666	O14757
5281666	P07477
5281666	P0DP23
5281666	Q15596
5281666	P48736
5281666	P04798
5281666	Q16678
5281666	P05177
5281707	P37231
5281707	P35354
5281707	P08238
5281707	P07900
5281707	P48736
5281707	P08684
5281707	O75469
5281707	P20813
5281707	Q16543
5281707	P03372
5281707	Q92731
5281708	P23219
5281708	P03372
5281708	P37231
5281708	P35354
5281708	P19793
5281708	P07550
5281708	Q16539
5281708	P08238
5281708	P07900
5281708	P24941
5281708	O14757
5281708	P07477
5281708	Q14432
5281708	Q04206
5281708	P15692
5281708	P01100
5281708	P38936
5281708	P56537
5281708	Q07812
5281708	P01375
5281708	P05412
5281708	P05231
5281708	P35228
5281708	P42574
5281708	P04637
5281708	P01130
5281708	P04040
5281708	P08069
5281708	P42224
5281708	P08684
5281708	Q03135
5281708	P05362
5281708	P55157
5281708	P04114
5281708	P19320
5281708	P04179
5281708	P29474
5281708	P42892
5281708	Q9UBS5
5281708	P05112
5281708	P50416
5281708	P0DP23
5281708	P35869
5281708	P61586
5281708	P02795
5281708	P06734
5281708	P46013
5281708	Q09472
5281708	P06576
5281708	P03923
5281708	P26439
5281708	P14060
5281708	P04155
5281708	O94759
5281708	P01241
5281708	Q86YN6
5281708	O60513
5281708	P10912
5281708	O43294
5281708	O43866
5281708	P07237
5281708	Q9P2J5
5281708	P08686
5281708	P24522
5281708	Q99728
5281708	Q8IUH3
5281708	Q92560
5281708	Q06609
5281708	O43570
5281708	Q92731
5281708	P43166
5281708	P22748
5281708	P22309
5281708	P05091
5281803	P35228
5281803	P23219
5281803	P03372
5281803	P10275
5281803	P37231
5281803	P35354
5281803	Q92731
5281803	P27487
5281803	Q16539
5281803	P49841
5281803	P08238
5281803	P07900
5281803	P24941
5281803	O14757
5281803	P07477
5281803	P11309
5281803	P20248
5281803	Q15596
5281803	P0DP23
5282102	P00742
5282102	P35354
5282102	P11388
5282102	P07477
5282102	P35228
5282102	P23219
5282102	P08238
5282102	P48736
5282102	P17612
5282102	Q15596
5282102	P25116
5282102	Q12809
5282102	P08709
5282102	P35968
5282102	P27487
5282102	P0DP23
5317750	P23219
5317750	P03372
5317750	P10275
5317750	P37231
5317750	P35354
5317750	P19793
5317750	Q14432
5317750	Q92731
5317750	Q16539
5317750	P49841
5317750	P08238
5317750	P07900
5317750	P24941
5317750	O14757
5317750	P07477
5317750	P11309
5317750	P20248
5317750	P0DP23
5317750	Q15788
5317750	P35228
5317750	P05067
5317750	P45452
5317750	P22894
5318267	P35354
5318267	P08709
5320315	P35228
5320315	P23219
5320315	P10275
5320315	Q14524
5320315	P35354
5320315	P19793
5320315	Q14432
5320315	P35368
5320315	P07550
5320315	P27487
5320315	P08238
5320315	P48736
5320315	P17612
5320315	P07477
5320315	Q15788
5320315	P0DP23
5320315	Q15596
5320315	P61925
5320315	P10415
5320315	P05231
5320315	P42574
5320315	P05177
5320315	P14635
5320315	P50613
5320315	P11712
6325021	P00918
6325021	P07477
11968867	P00918
12315350	P00918
12315350	P07477
12315451	P35354
12315451	P47869
12315451	P31644
12315451	P23975
12315451	P34903
12315451	P14867
12315451	P42262
12315451	Q16445
14077830	Q15596
14077830	Q02880
14077830	P35354
21602023	P07477
21602023	P00918
74977390	P35354
74977390	P11388
74977390	Q02880
74977390	Q15596

## Sheet: Sheet2
311	P07741	柠檬酸、油酸、水晶兰苷、壬二酸
311	P15121
311	P40926
311	P12931
311	P12724
311	P15086
311	Q9HB21
311	P07360
311	P07998
311	P62312
311	Q9BY32
311	O75390
311	Q9GZU7
311	Q96RQ9
311	O14964
311	P00742
311	P35354
311	P07339
311	P01857
311	P29475
311	P14867
311	P42262
311	P60174
311	Q13002
311	P19113
311	O60240
311	Q00G26
2266	P51857
2266	P31213
2266	P14679
445639	P23219
445639	Q15596
445639	P35354
445639	P00325
445639	P00326
445639	P07327
445639	Q05603
445639	P35030
445639	P19793
445639	P00183
445639	P00749
445639	P00441
445639	P04040
445639	Q99973
445639	P05305
445639	P04626
445639	P37231
445639	P06858
445639	P17677
445639	P05121
445639	P23560
445639	P04035
445639	P05164
445639	Q07869
445639	Q03181
445639	P02741
445639	P27169
445639	P01308
445639	P00747
445639	P07148
445639	P50120
445639	Q07075
445639	P55851
445639	P35610
445639	P06307
445639	Q99966
445639	Q16620
445639	P52945
445639	P11168
445639	P19021
445639	O00767
445639	P55916
445639	P11597
445639	P10082
445639	Q9ULA0
445639	O00519
445639	Q01469
445639	O14746
445639	P15090
73466	P00918
73466	P27487
